# Supplementary material for: Novel Cyclovirus Species in Dogs with Hemorrhagic Gastroenteritis
Source: MDPI journal article supplement (doi:10.3390/v13112155), 2021-10-26
Supplement: s1 [file s1]

**Supplementary figure S8.** Alignment of the CN9E putative deduced capsid (Cp) amino acid (aa) sequences derived using the standard genetic code (shown as CN9E/Cp/STD\_code) with ‘ATG’ as initiation codon and invertebrate mitochondrial genetic code (shown as CN9E/Cp/INV-Mit\_code) with ‘ATG’ as the initiation codon. A ‘\*’ denotes an identical aa residue. Numbers to the right indicate the positions of the aa for respective sequences.

```

CN9E/Cp/STD_code      MRRRIRRFRRRYRLRTQRRYRKRVKTSSLVRHHRALSSTDNLTVYLTARVRLNLPEPNPS 60
CN9E/Cp/INV-Mit_code  MRRRISRFRRRYRLRTQSRYRKRVKTSSLVRHHRALSSTDNLTVYLTARVRLNLPEPNPS 60
*****

CN9E/Cp/STD_code      TPFYGSGKYDLSFFQNEAYTETNLPAVHRFFQYYRIHWIKEELKPAFNVIKNIDPYSYLN 120
CN9E/Cp/INV-Mit_code  TPFYGSGKYDLSFFQNEAYTETNLPAVHSFFQYYRIHWMKEELKPAFNVIKNIDPYSYLN 120
*****

CN9E/Cp/STD_code      SQTEQLTTWRNRNMTSYVCAPWKRQNPPANELELSITKGAKKIRAHQECRRKFKPAVYTA 180
CN9E/Cp/INV-Mit_code  SQTEQLTTWRNRNMTSYVCAPWKRQNPPANELELSMTKGAKKIRAHQECRRKFKPAVYTA 180
*****

CN9E/Cp/STD_code      QQSNTTQQYTFTDMKYSFKIASDANGVRVPHWCSYWFLPYFQITPTNPGTPETTDYPLFE 240
CN9E/Cp/INV-Mit_code  QQSNTTQQYTFTDMKYSFKMASDANGVRVPHWCSYWFLPYFQITPTNPGTPETTDYPLFE 240
*****

CN9E/Cp/STD_code      MWATAKVTTYKFSQYNVN 258
CN9E/Cp/INV-Mit_code  MWATAKVTTYKFSQYNVN 258
*****

```
