# Supplementary material for: Novel Cyclovirus Species in Dogs with Hemorrhagic Gastroenteritis
Source: MDPI journal article supplement (doi:10.3390/v13112155), 2021-10-26

**Supplementary figure S4.** Two-dimensional graphical representation of pairwise deduced amino acid sequence (%) identities between the putative Rep of cycloviruses. The plot was created using the Sequence Demarcation Tool Version 1.2 (SDTv1.2) with the MUSCLE alignment algorithm, as described previously [2]. The canine associated cycloviruses are highlighted with asterisks “\*”.

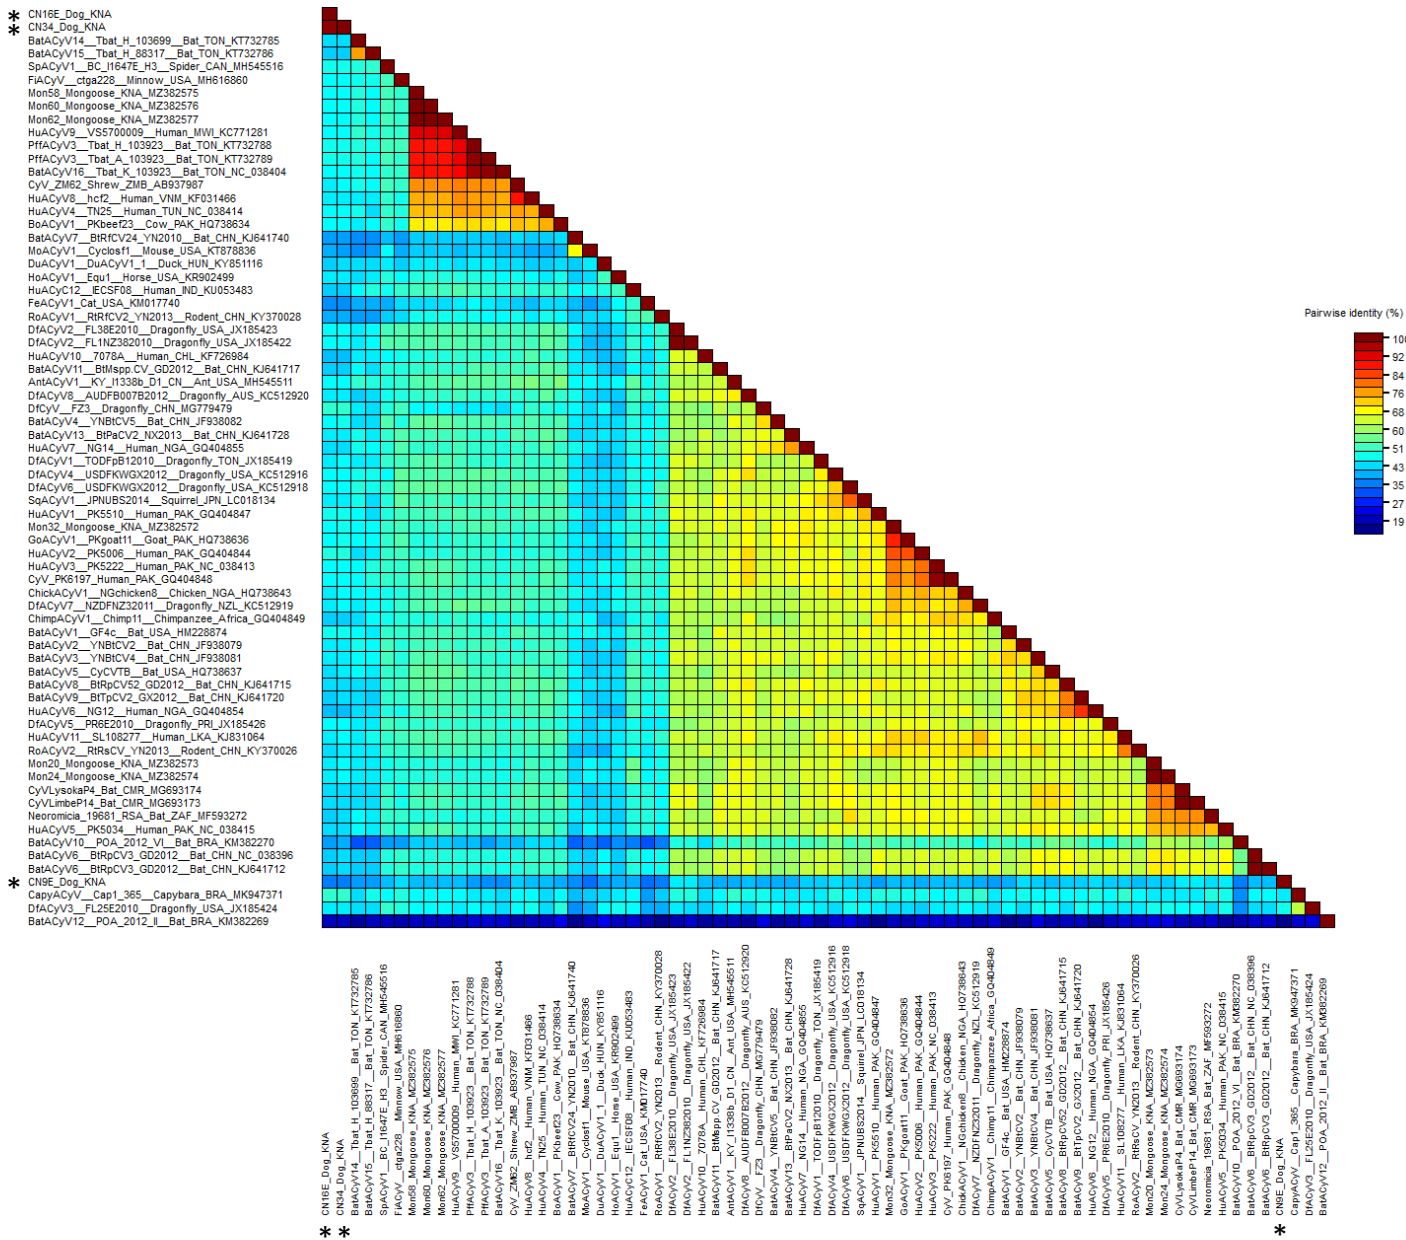

Supplement: s1 [file s1]
