# Supplementary material for: Novel Cyclovirus Species in Dogs with Hemorrhagic Gastroenteritis
Source: MDPI journal article supplement (doi:10.3390/v13112155), 2021-10-26
Supplement: s1 [file s1]

**Supplementary table S1.** Additional primers employed in inverse nested PCRs to amplify the complete genomes of canine associated cycloviruses.

| Canine associated cyclovirus | Primer name         | Primer sequence (5'-3')                | Primer position             |
|------------------------------|---------------------|----------------------------------------|-----------------------------|
| <b>CN9E</b>                  | CN9E-F1             | AGATACCACAGGGAATTAGAGC <sup>1</sup>    | nt 493-nt 515 <sup>2</sup>  |
|                              | CN9E-R1             | GATGAGCGATGGCGATCTGATTG <sup>1</sup>   | nt 478-nt 456 <sup>2</sup>  |
|                              | CN9E-Nested PCR-F2  | GCGCTTGAACAGTTACGTGGACG <sup>1</sup>   | nt 526-nt 548 <sup>2</sup>  |
|                              | CN9E-Nested PCR-R2  | ATCCAAGTCGCTACGATGTCCTTG <sup>1</sup>  | nt 420-nt 397 <sup>2</sup>  |
|                              |                     |                                        |                             |
| <b>CN16E and CN34</b>        | CN16E-F1            | ACGTAATGACCTTGACGACGTTG <sup>3</sup>   | nt 339-nt 361 <sup>4</sup>  |
|                              | CN16E-R1            | CTTGTTGTTGTGGTTCCCATATTC <sup>3</sup>  | nt 334- nt 310 <sup>4</sup> |
|                              | CN16E-Nested PCR-F2 | TTATGCAGTGGGAACTGGGACG <sup>3</sup>    | nt 461-nt 482 <sup>4</sup>  |
|                              | CN16E-Nested PCR-R2 | TGGCTGTTTTCTCCGATGATTGATC <sup>3</sup> | nt 242- nt 208 <sup>4</sup> |

The primer sequences were designed manually from the partial *rep* sequence of CN9E <sup>1</sup> and CN16E <sup>3</sup>. The partial *rep* (~400 bp) of the canine associated cycloviruses were amplified by nested PCR assays employing pan-*rep* primers (CV-F1, CV-R1, CV-F2 and CV-R2) as previously described by Li et al. [3].

Nucleotide (nt) position corresponds to that of the reverse complement of complete genome sequence of canine associated circovirus CN9E <sup>2</sup> and CN16E <sup>4</sup>. Following the recommendations of the ICTV classification system [1, 2], the first nt of the nonanucleotide motif was considered as 'position one' of the 'CN' sequences.
