# Supplementary material for: Novel Cyclovirus Species in Dogs with Hemorrhagic Gastroenteritis
Source: MDPI journal article supplement (doi:10.3390/v13112155), 2021-10-26
Supplement: s1 [file s1]

**Supplementary figure S2.** The conserved arginine rich region was retained in the amino terminus of the putative capsid proteins (Cp) of canine associated cyclovirus CN9E, CN16E and CN34. A '-' denotes absence of an amino acid (aa) residue at that position. Numbers to the right indicate the positions of the aa for respective sequences.

|          |                                                              |    |
|----------|--------------------------------------------------------------|----|
| CN9E_Cp  | -----MRRRISRFRRRYRLRTQSRYRKRVKTSSLVRHHRALSSTDN---LTVYLTARVRL | 52 |
| CN16E_Cp | MYRRTFRRRFRRYRRRFRRFSRFRNRRFARAHKTRRHLSGGQYFTRLVRSETWDTSQSY  | 60 |
| CN34_Cp  | MYRRTFRRRFRRYRRRFRRFSRFRNRRFARAHKTRRHLSGGQYFTRLVRSETWDTSQSY  | 60 |
