# Supplementary material for: Novel Cyclovirus Species in Dogs with Hemorrhagic Gastroenteritis
Source: MDPI journal article supplement (doi:10.3390/v13112155), 2021-10-26
Supplement: s1 [file s1]

**Supplementary figure S6.** Identification of putative recombination event involving canine associated cyclovirus CN9E and dragonfly associated cyclovirus 4 isolate US-DFKWGX-2012/Dragonfly/USA/KC512916, as determined by the Recombination Detection Program (RDP v.4.101). A sequence was considered as a recombinant if it was identified by two or more than two methods with a highest acceptable *p-value* of  $p < 0.01$  with Bonferroni's correction.

**Recombinant:** Canine associated cyclovirus CN9E/Dog/KNA

**Major parent:** Unknown

**Minor parent:** Dragonfly associated cyclovirus 4 isolate US-DFKWGX-2012/Dragonfly/USA/KC512916

**Beginning breakpoint:** nt 1303 (without gaps)

**Ending breakpoint:** nt 1481 (without gaps)

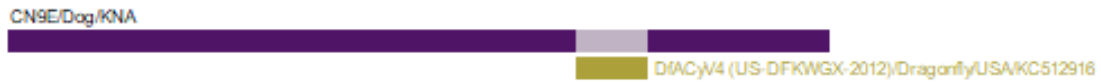

Confirmation table generated by RDP v.4.101 program.

| <i>Method</i> | <i>Average p-value</i>  |
|---------------|-------------------------|
| RDP           | $4.534 \times 10^{-02}$ |
| MaxChi        | $2.027 \times 10^{-02}$ |
| Chimaera      | $1.384 \times 10^{-02}$ |
