# Supplementary material for: Novel Cyclovirus Species in Dogs with Hemorrhagic Gastroenteritis
Source: Viruses. 2021 Oct 26;13(11):2155. doi: 10.3390/v13112155 (PMC8622408; doi:10.3390/v13112155)
Supplement: Supplementary file 1 [file viruses-13-02155-s001.zip]

Archive with 8 entries (8 files):
- Supplementary figure S2.pdf
- Supplementary figure S3.pdf
- Supplementary figure S4.pdf
- Supplementary figure S5.pdf
- Supplementary figure S6.pdf
- Supplementary figure S7.pdf
- Supplementary figure S8.pdf
- Supplementary table S1.pdf
